# Supplementary material
Source: MDPI journal article supplement (https://www.mdpi.com/2073-4344/10/1/31)
Supplement: s1 [file s1]

Supplementary information

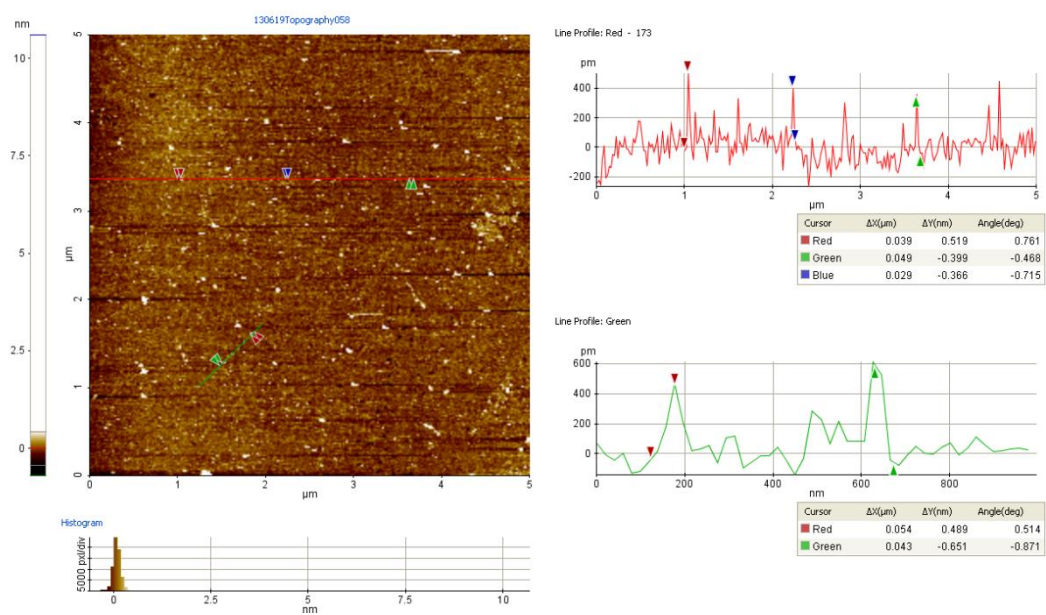

**Figure S1.** AFM topography image and line profiles of small Ag nanoclusters deposited on mica
